# Supplementary material
Source: PubMed Central journal article supplement (PMC4801146)
Supplement: NIHMS768073-supplement-01.pdf [file NIHMS768073-supplement-01.pdf]

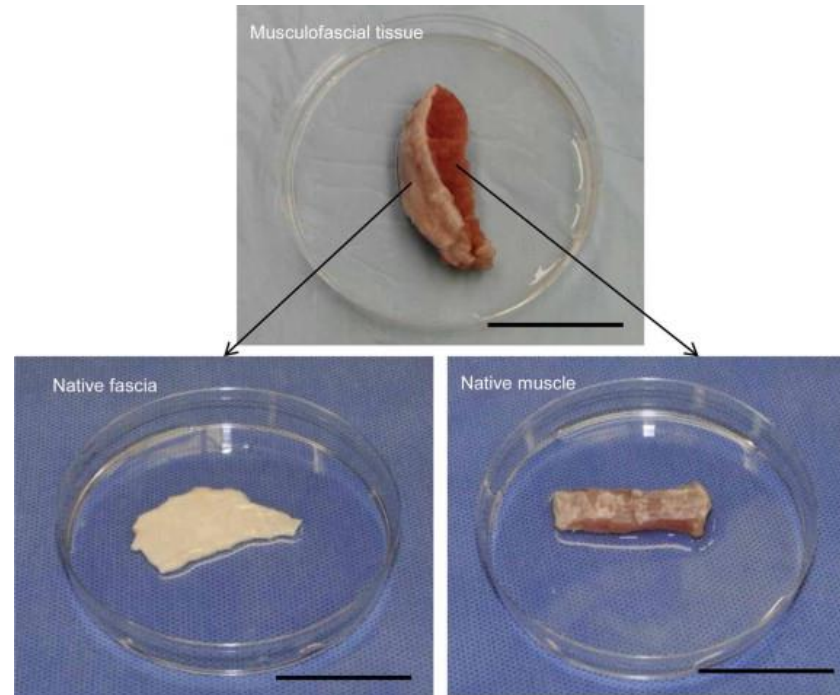

Supplementary Fig. 1. Images of harvested anterior rectus fascia and rectus abdominal muscle samples. Scale bar = 20 mm.

Lina Wang, Joshua A. Johnson, David W. Chang, Qixu Zhang

**Decellularized musculofascial extracellular matrix for tissue engineering**

Biomaterials, Volume 34, Issue 11, 2013, 2641–2654

<http://dx.doi.org/10.1016/j.biomaterials.2012.12.048>

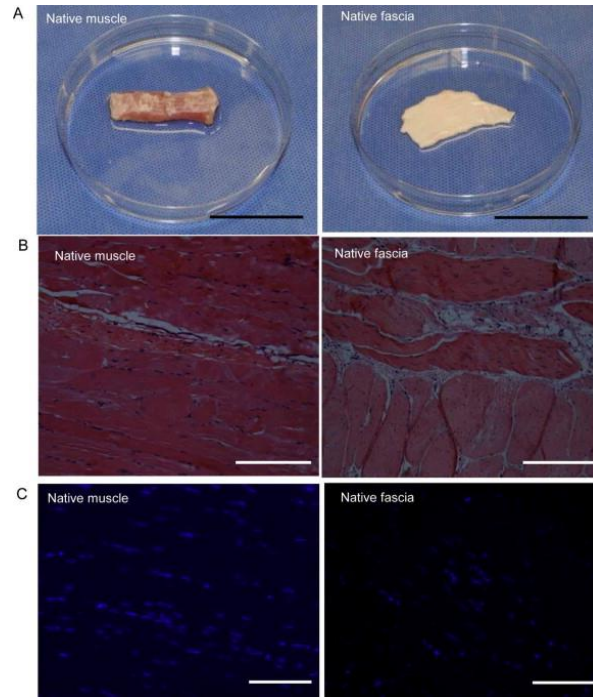

Supplementary Fig. 2. Evaluation of native musculofascial tissues. (A) Images of muscle and fascial tissue before decellularization. (B) H&E staining of native samples (native muscle and native fascia). (C) DAPI staining of native samples. Scale bar = 20 m...

Lina Wang, Joshua A. Johnson, David W. Chang, Qixu Zhang

### **Decellularized musculofascial extracellular matrix for tissue engineering**

Biomaterials, Volume 34, Issue 11, 2013, 2641–2654

<http://dx.doi.org/10.1016/j.biomaterials.2012.12.048>

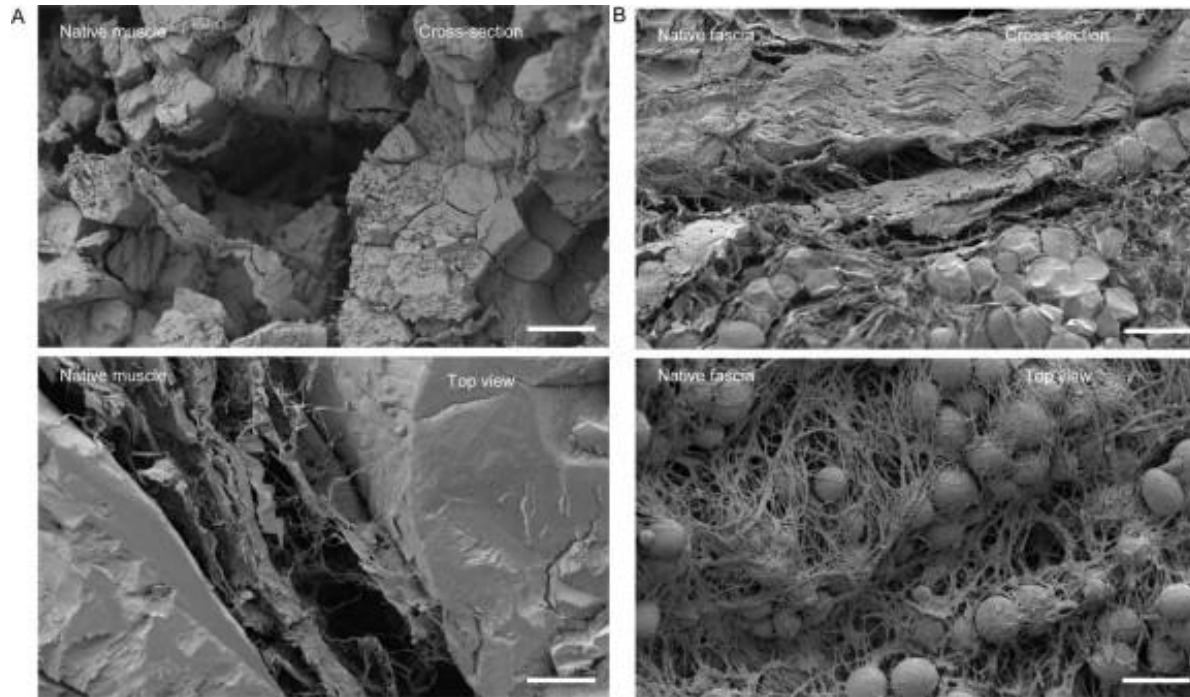

Supplementary Fig. 3. SEM images of native muscle (A) and native fascia (B). The top row in each image shows the cross-sectional view, the bottom row shows the top view. Scale bar = 100  $\mu\text{m}$ .

Lina Wang, Joshua A. Johnson, David W. Chang, Qixu Zhang

**Decellularized musculofascial extracellular matrix for tissue engineering**

Biomaterials, Volume 34, Issue 11, 2013, 2641–2654

<http://dx.doi.org/10.1016/j.biomaterials.2012.12.048>

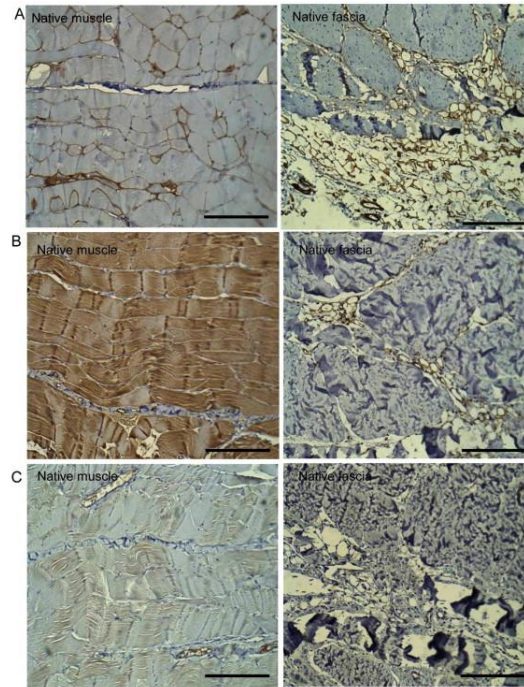

Supplementary Fig. 4. Characterization of native muscle and native fascia components. (A) Laminin staining. (B) VEGF staining. (C) MHC-1 staining. Scale bar = 200  $\mu\text{m}$ .

Lina Wang, Joshua A. Johnson, David W. Chang, Qixu Zhang

### **Decellularized musculofascial extracellular matrix for tissue engineering**

Biomaterials, Volume 34, Issue 11, 2013, 2641–2654

<http://dx.doi.org/10.1016/j.biomaterials.2012.12.048>
